# Supplementary material
Source: Royal Society of Chemistry journal article supplement (doi:10.1039/d6ay00681g)
Supplement: d6ay00681g3.pdf [file d6ay00681g3.pdf]

## **Dual-Enhancement Lateral Flow Immunoassay via Gold-Decorated Ferritin Nanoprobes and SpyTag/SpyCatcher Site-Directed Conjugation**

Xiangyang Yuan<sup>1</sup>, Xingyu Zhu<sup>1</sup>, Yuling Xu<sup>1</sup>, Jianfeng Mei<sup>1</sup>, Shujiang Wu<sup>2</sup>, Bailong Wang<sup>2</sup>, Yu Yi<sup>1,3\*</sup>

<sup>1</sup>College of Pharmaceutical Science, Zhejiang University of Technology, Hangzhou 310014, China

<sup>2</sup>Biotest Biotech Co., Ltd, Hangzhou 310014, China

<sup>3</sup>Zhejiang Key Laboratory of Green, Low-carbon and Efficient Development of Marine Fishery Resources, Hangzhou 310014, China

\*Corresponding author: Dr. Yu Yi

Address for correspondence: College of Pharmaceutical Science, Zhejiang University of Technology, Hangzhou 310014, China

E-mail address: yiyu1106@zjut.edu.cn

# 1. Effect of addition order on ST-HFn@Au assembly

According to Table S1, add PB buffer and 0.2% AuNPs into a 1.5 mL centrifuge tube, mix thoroughly, then quickly add 50  $\mu$  L of 2 mg/mL ST-HFn and mix immediately.

**Table S1.** Preparation of ST-HFn@Au at different dilutions (normal addition)

| Dilution    | PB buffer( $\mu$ L) | 0.2%AuNPs( $\mu$ L) | 2 mg/mL ST-HFn ( $\mu$ L) |
|-------------|---------------------|---------------------|---------------------------|
| 2 $\times$  | 200                 | 200                 | 50                        |
| 4 $\times$  | 400                 | 200                 | 50                        |
| 6 $\times$  | 600                 | 200                 | 50                        |
| 8 $\times$  | 800                 | 200                 | 50                        |
| 10 $\times$ | 1000                | 200                 | 50                        |

According to Table S2, add PB buffer and 50  $\mu$  L of 2 mg/mL ST-HFn into a 1.5 mL centrifuge tube, mix thoroughly, then quickly add 200  $\mu$  L of 0.2% AuNPs and mix immediately.

**Table S2.** Preparation of ST-HFn@Au at different dilutions (added in reverse order)

| Dilution    | PB buffer( $\mu$ L) | 0.2%AuNPs( $\mu$ L) | 2 mg/mL ST-HFn ( $\mu$ L) |
|-------------|---------------------|---------------------|---------------------------|
| 2 $\times$  | 200                 | 50                  | 200                       |
| 4 $\times$  | 400                 | 50                  | 200                       |
| 6 $\times$  | 600                 | 50                  | 200                       |
| 8 $\times$  | 800                 | 50                  | 200                       |
| 10 $\times$ | 1000                | 50                  | 200                       |

ST-HFn@Au prepared under different dilutions and addition orders, as well as AuNPs, were taken and diluted to the same concentration (calculated as Au). Then, 200  $\mu$  L of each diluted sample was added to a 96-well plate, with PB buffer serving as a blank control. The 96-well plate was photographed, and the images were processed and subjected to grayscale analysis using Image J software.

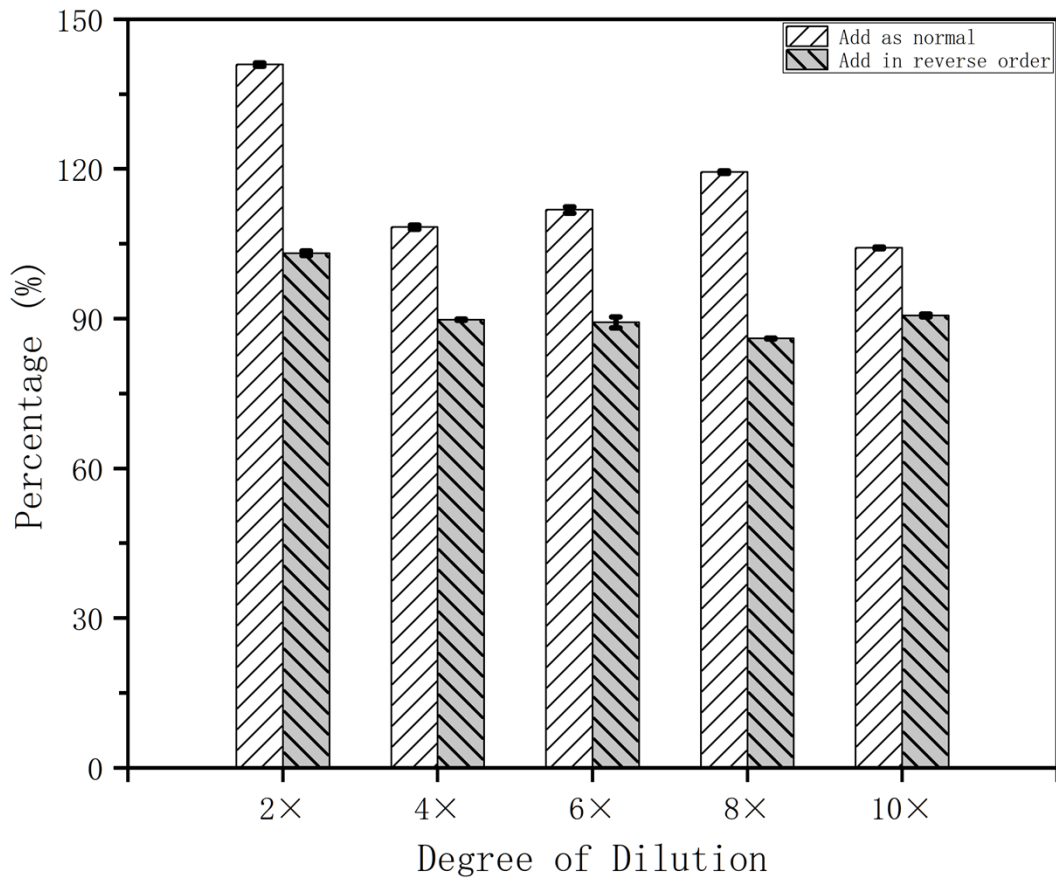

Figure S1. Effect of addition order

## 2. Precision of detection

Intra-batch consistency evaluation: Test strips from the same batch were used to detect hCG at concentrations of 2.5, 10, and 20 mIU/mL. The corresponding T/C values were measured, and the coefficient of variation (CV) was calculated.

Table S3. Intra-batch consistency evaluation of the site-directed coupling test strips at different hCG concentrations.

| hCG/(mIU/mL) | T/C   | Average of T/C | SD    | CV (%) |
|--------------|-------|----------------|-------|--------|
| 2.5          | 0.336 | 0.339          | 0.004 | 1.05   |
|              | 0.338 |                |       |        |
|              | 0.343 |                |       |        |
|              | 0.384 |                |       |        |
| 10           | 0.392 | 0.386          | 0.006 | 1.63   |
|              | 0.380 |                |       |        |
|              | 0.471 |                |       |        |
|              | 0.469 |                |       |        |
| 20           | 0.478 | 0.473          | 0.005 | 1.63   |
|              |       |                |       |        |

Inter-batch consistency evaluation: Test strips from different batches were used to detect hCG at concentrations of 2.5, 10, and 20 mIU/mL. The corresponding T/C values were measured, and the coefficient of variation (CV) was calculated.

**Table S4.** Inter-batch consistency evaluation of the site-directed coupling test strips at different hCG concentrations.

| hCG (mIU/mL) | T/C   | Average of T/C | SD    | CV (%) |
|--------------|-------|----------------|-------|--------|
| 2.5          | 0.327 | 0.354          | 0.029 | 8.09   |
|              | 0.384 |                |       |        |
|              | 0.350 |                |       |        |
| 10           | 0.334 | 0.401          | 0.058 | 14.54  |
|              | 0.431 |                |       |        |
|              | 0.439 |                |       |        |
| 20           | 0.510 | 0.543          | 0.047 | 8.70   |
|              | 0.597 |                |       |        |
|              | 0.521 |                |       |        |

## Data Availability Statement

The data supporting the results of this study are available within the article.
