# Supplementary material
Source: Royal Society of Chemistry journal article supplement (doi:10.1039/d6ay00681g)

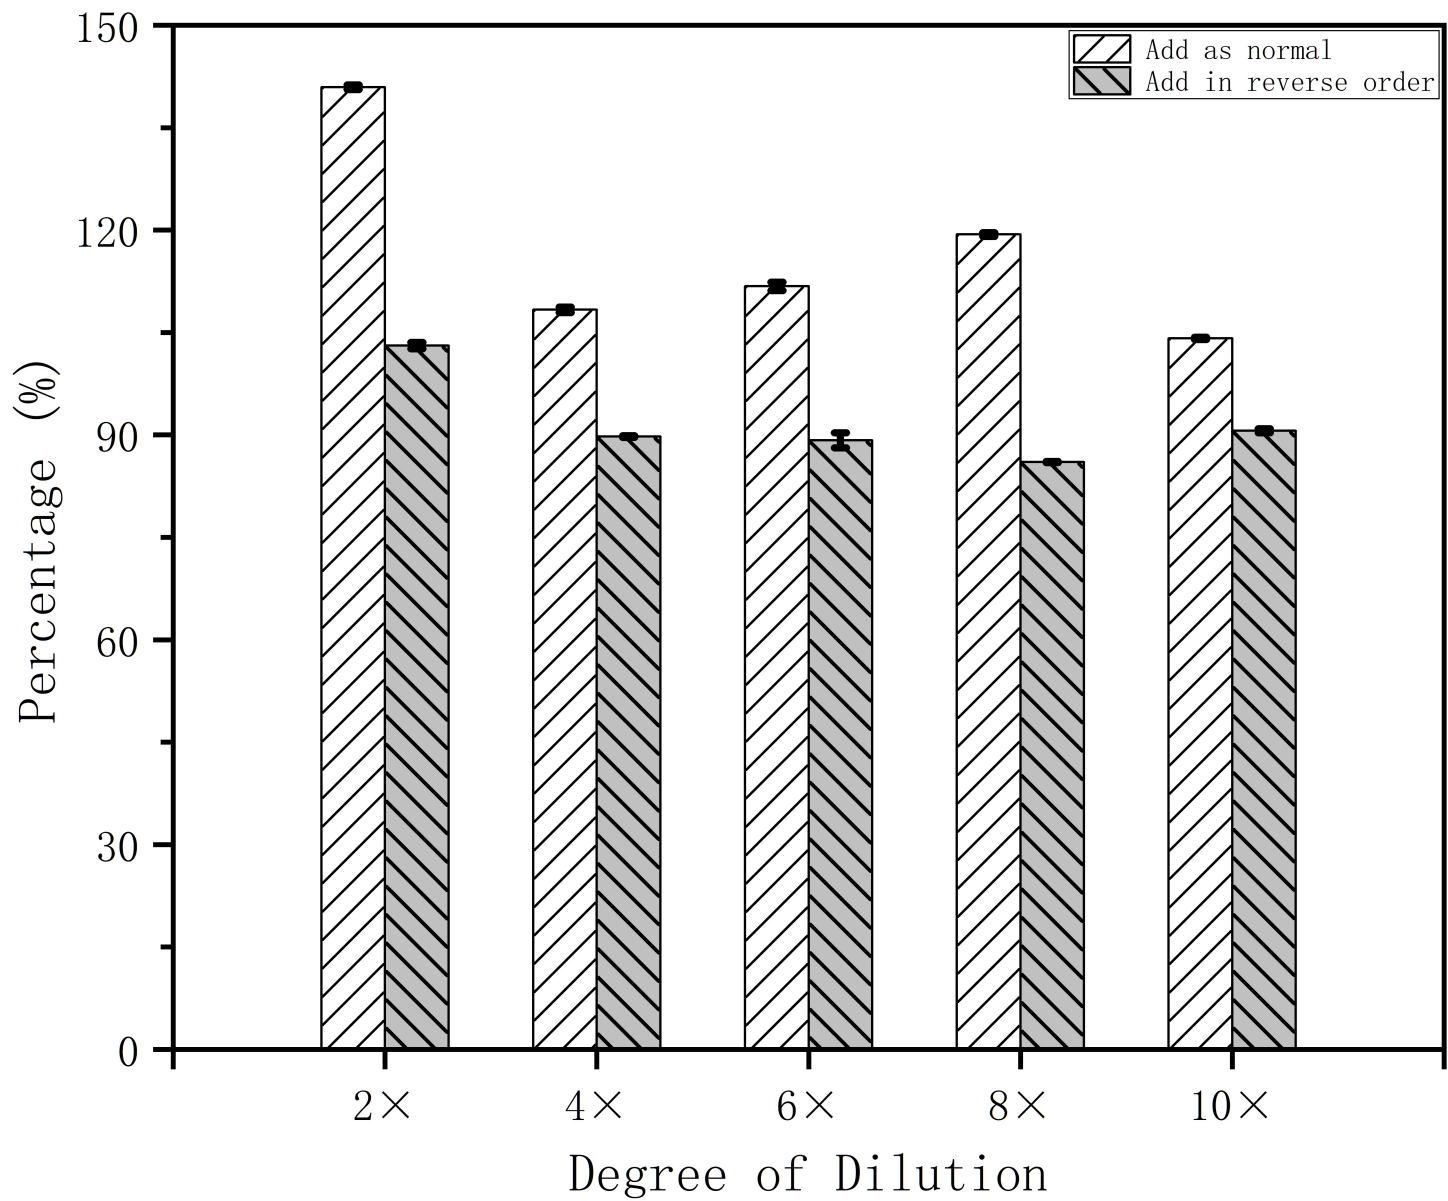

Supplement: d6ay00681g2.pdf [file d6ay00681g2.pdf]
